# Supplementary material for: Theoretical study on functionalized acrylonitrile compounds with a large second-order nonlinear optical response
Source: Royal Society of Chemistry journal article supplement (doi:10.1039/d0nj04575f), 2020-01-01
Supplement: d0nj04575f1.pdf [file d0nj04575f1.pdf]

## Theoretical study on functionalized acrylonitrile compounds with large second-order nonlinear optical response

Author: Lijing Gong,<sup>\*,‡</sup> Cheng Ma,<sup>‡</sup> Tiejun Liu, Jinkai Lv, and Xianchao Xun  
*Aviation University of Air Force, Changchun 130022, China*

### Contents

| Index                                                                                                                                             | Page |
|---------------------------------------------------------------------------------------------------------------------------------------------------|------|
| 1. Electron and hole distributions of two main absorption bands·····                                                                              | S2   |
| 2. Chole and Cele of the main absorption bands for compounds <b>1</b> and <b>4</b> ·····                                                          | S2   |
| 3. The selected bond lengths for compound <b>1</b> between experiment and calculation···                                                          | S3   |
| 4. The computed absorption wavelengths ( $\lambda$ , nm) using the B3LYP functional at the different basis sets level for compound <b>1</b> ····· | S4   |
| 5. The computed absorption wavelengths ( $\lambda$ , nm) using the B3LYP functional at the different basis sets level for compound <b>4</b> ····· | S4   |
| 6. The computed absorption wavelengths ( $\lambda$ , nm) using the different functionals at 6-31G(d) basis set level for compound <b>1</b> ·····  | S4   |
| 7. The calculated $\beta_{\text{HRS}}$ values of the compound <b>1</b> ·····                                                                      | S4   |
| 8. Cartesian Coordinates of Optimized Structures ·····                                                                                            | S5   |

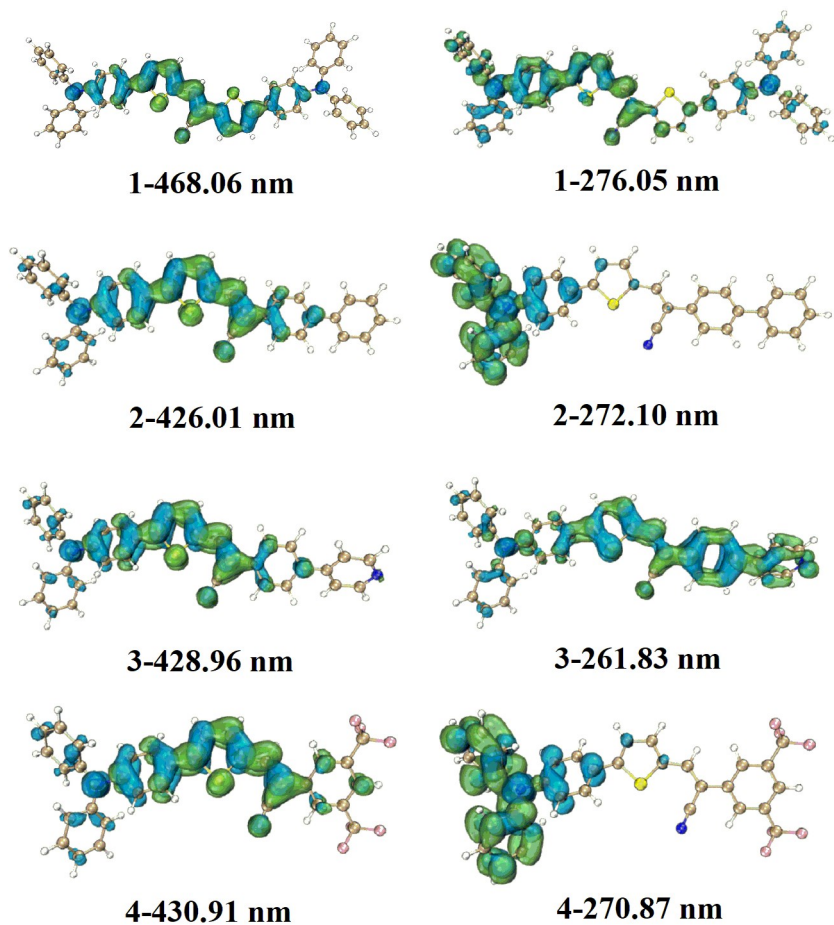

**Fig.S1.** Electron and hole distributions of two main absorption bands for compounds 1-4, and the blue color and green color represent holes and electrons respectively.

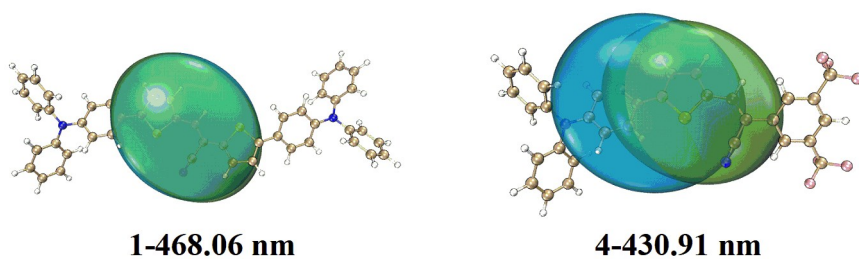

**Fig.S2.** Chole and Cele of the main absorption bands for compounds 1 and 4, and the blue color and green color represent holes and electrons respectively.

**Table S1.** The selected bond lengths for compound **1** between experiment and calculation.

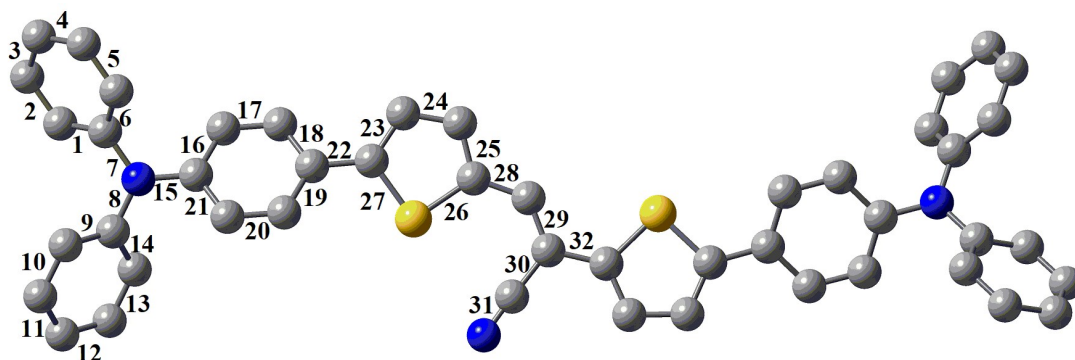

Optimized geometry of compound **1** (not show hydrogens)

| Bond      | D3-B3LYP |       | Experiment | Difference |        |
|-----------|----------|-------|------------|------------|--------|
|           | gas      | THF   |            | gas        | THF    |
| <b>1</b>  | 1.402    | 1.402 | 1.397      | 0.005      | 0.005  |
| <b>2</b>  | 1.393    | 1.393 | 1.382      | 0.011      | 0.011  |
| <b>3</b>  | 1.396    | 1.397 | 1.376      | 0.020      | 0.021  |
| <b>4</b>  | 1.396    | 1.397 | 1.387      | 0.009      | 0.010  |
| <b>5</b>  | 1.392    | 1.393 | 1.373      | 0.019      | 0.020  |
| <b>6</b>  | 1.402    | 1.402 | 1.398      | 0.004      | 0.004  |
| <b>7</b>  | 1.420    | 1.422 | 1.403      | 0.017      | 0.019  |
| <b>8</b>  | 1.420    | 1.421 | 1.431      | -0.011     | -0.010 |
| <b>9</b>  | 1.402    | 1.402 | 1.392      | 0.010      | 0.010  |
| <b>10</b> | 1.393    | 1.393 | 1.393      | 0.000      | 0.000  |
| <b>11</b> | 1.396    | 1.397 | 1.378      | 0.018      | 0.019  |
| <b>12</b> | 1.396    | 1.397 | 1.380      | 0.016      | 0.017  |
| <b>13</b> | 1.393    | 1.393 | 1.393      | 0.000      | 0.000  |
| <b>14</b> | 1.401    | 1.402 | 1.379      | 0.022      | 0.023  |
| <b>15</b> | 1.408    | 1.405 | 1.427      | -0.019     | -0.022 |
| <b>16</b> | 1.406    | 1.407 | 1.395      | 0.011      | 0.012  |
| <b>17</b> | 1.385    | 1.385 | 1.374      | 0.011      | 0.011  |
| <b>18</b> | 1.408    | 1.409 | 1.386      | 0.022      | 0.023  |
| <b>19</b> | 1.408    | 1.408 | 1.395      | 0.013      | 0.013  |
| <b>20</b> | 1.387    | 1.386 | 1.383      | 0.004      | 0.003  |
| <b>21</b> | 1.405    | 1.407 | 1.379      | 0.026      | 0.028  |
| <b>22</b> | 1.457    | 1.456 | 1.458      | -0.001     | -0.002 |
| <b>23</b> | 1.385    | 1.386 | 1.372      | 0.013      | 0.014  |

|    |       |       |       |        |        |
|----|-------|-------|-------|--------|--------|
| 24 | 1.407 | 1.407 | 1.404 | 0.003  | 0.003  |
| 25 | 1.390 | 1.391 | 1.364 | 0.026  | 0.027  |
| 26 | 1.758 | 1.762 | 1.737 | 0.021  | 0.025  |
| 27 | 1.750 | 1.753 | 1.727 | 0.023  | 0.026  |
| 28 | 1.426 | 1.425 | 1.436 | -0.010 | -0.011 |
| 29 | 1.370 | 1.372 | 1.341 | 0.029  | 0.031  |
| 30 | 1.430 | 1.429 | 1.450 | -0.020 | -0.021 |
| 31 | 1.165 | 1.165 | 1.148 | 0.017  | 0.017  |
| 32 | 1.454 | 1.455 | 1.464 | -0.010 | -0.009 |

**Note:** the difference is equal to calculation value minus experimental value

**Table S2.** The computed absorption wavelengths ( $\lambda$ , nm) using the B3LYP functional at the different basis sets level for compound **1** along with the experimental values.

| Basis set | 6-31G(d) | 6-31G(d,p) | 6-31+G(d) | 6-31+G(d,p) | 6-31++G(d,p) | Exp |
|-----------|----------|------------|-----------|-------------|--------------|-----|
| Band1     | 331.61   | 332.10     | 341.82    | 342.90      | 342.49       | 304 |
| Band2     | 552.28   | 552.82     | 562.20    | 562.90      | 562.83       | 482 |

**Table S3.** The computed absorption wavelengths ( $\lambda$ , nm) using the B3LYP functional at the different basis sets level for compound **4** along with the experimental values.

| Basis set | 6-31G(d) | 6-31G(d,p) | 6-31+G(d) | 6-31+G(d,p) | 6-31++G(d,p) | Exp |
|-----------|----------|------------|-----------|-------------|--------------|-----|
| Band1     | 377.14   | 377.56     | 384.07    | 384.61      | 384.63       | 286 |
| Band2     | 522.27   | 522.82     | 535.21    | 535.95      | 535.92       | 439 |

**Table S4.** The computed absorption wavelength ( $\lambda$ , nm) in gas and solution (in parentheses) phases, using the different functionals at 6-31G(d) basis set level for compound **1** along with the experimental values.

| Functional | B3LYP  | B3LYP-D3 | CAM-B3LYP(in THF) | BH&HLYP | Exp |
|------------|--------|----------|-------------------|---------|-----|
| Band1      | 331.61 | 338.88   | 272.96(276.05)    | 272.64  | 304 |
| Band2      | 552.28 | 590.27   | 447.93(468.06)    | 452.04  | 482 |

**Table S5.** The calculated  $\beta_{\text{HRS}}$  values ( $\times 10^{-30}$  esu) of the compound **1** by using three

DFT functionals associated with the 6-31+G(d) basis set and using CAM-B3LYP/6-31G(d) basis set (in parentheses).

| Functional           | B3LYP | CAM-B3LYP    | M06-2X |
|----------------------|-------|--------------|--------|
| $\beta_{\text{HRS}}$ | 24.72 | 19.55(18.57) | 21.00  |

**Table S6.** Cartesian Coordinates for compound **1**, optimized at the B3LYP-D3/6-31G(d) level of theory

| Center Number | Atomic Type | Coordinates (Angstroms) |           |           |
|---------------|-------------|-------------------------|-----------|-----------|
|               |             | X                       | Y         | Z         |
| 1             | S           | -2.966332               | -0.175034 | 0.010299  |
| 2             | S           | 2.982549                | -0.526259 | -0.001529 |
| 3             | N           | 1.137296                | -3.31304  | -0.049193 |
| 4             | N           | -9.74081                | 0.353822  | 0.031173  |
| 5             | N           | 9.727825                | 0.199748  | 0.01005   |
| 6             | C           | -4.291556               | -1.329229 | -0.036175 |
| 7             | C           | -3.796875               | -2.615677 | -0.076215 |
| 8             | H           | -4.437096               | -3.488348 | -0.132954 |
| 9             | C           | -2.382677               | -2.687719 | -0.079894 |
| 10            | H           | -1.822575               | -3.614835 | -0.11992  |
| 11            | C           | -1.766271               | -1.452966 | -0.044899 |
| 12            | C           | -0.338042               | -1.178811 | -0.046886 |
| 13            | C           | 0.20276                 | 0.080398  | -0.050891 |
| 14            | H           | -0.504493               | 0.907584  | -0.060741 |
| 15            | C           | 1.562753                | 0.511139  | -0.046349 |
| 16            | C           | 1.953348                | 1.845237  | -0.073232 |
| 17            | H           | 1.231127                | 2.654325  | -0.107019 |
| 18            | C           | 3.347615                | 2.034839  | -0.070354 |
| 19            | H           | 3.820355                | 3.008566  | -0.120915 |
| 20            | C           | 4.06409                 | 0.850011  | -0.039132 |
| 21            | C           | 5.509658                | 0.670563  | -0.028164 |
| 22            | C           | 6.359742                | 1.720684  | 0.369353  |
| 23            | H           | 5.930186                | 2.658225  | 0.707892  |
| 24            | C           | 7.737161                | 1.569643  | 0.3852    |
| 25            | H           | 8.368387                | 2.38808   | 0.713029  |
| 26            | C           | 8.328347                | 0.354529  | -0.003589 |
| 27            | C           | 7.490051                | -0.700302 | -0.402637 |
| 28            | H           | 7.928734                | -1.640374 | -0.71783  |
| 29            | C           | 6.112475                | -0.543106 | -0.409134 |
| 30            | H           | 5.492931                | -1.368214 | -0.74868  |
| 31            | C           | 0.494961                | -2.341609 | -0.047039 |
| 32            | C           | -5.679504               | -0.88408  | -0.018658 |
| 33            | C           | -6.053818               | 0.408477  | -0.428603 |
| 34            | H           | -5.296561               | 1.095324  | -0.796074 |
| 35            | C           | -7.379848               | 0.81632   | -0.418129 |
| 36            | H           | -7.643615               | 1.812613  | -0.755451 |

|    |   |            |           |           |
|----|---|------------|-----------|-----------|
| 37 | C | -8.391608  | -0.055976 | 0.014716  |
| 38 | C | -8.029019  | -1.347495 | 0.43358   |
| 39 | H | -8.796482  | -2.027381 | 0.787064  |
| 40 | C | -6.70237   | -1.749636 | 0.413991  |
| 41 | H | -6.446255  | -2.740805 | 0.774869  |
| 42 | C | 10.571813  | 1.293019  | -0.319572 |
| 43 | C | 10.269366  | 2.118367  | -1.411649 |
| 44 | H | 9.384724   | 1.912272  | -2.005004 |
| 45 | C | 11.098737  | 3.191871  | -1.726844 |
| 46 | H | 10.852877  | 3.823843  | -2.575661 |
| 47 | C | 12.247063  | 3.445272  | -0.974077 |
| 48 | H | 12.895603  | 4.278535  | -1.227268 |
| 49 | C | 12.554495  | 2.615996  | 0.106345  |
| 50 | H | 13.442289  | 2.805035  | 0.703302  |
| 51 | C | 11.720962  | 1.551343  | 0.440413  |
| 52 | H | 11.952689  | 0.911997  | 1.285744  |
| 53 | C | 10.310665  | -1.050664 | 0.34729   |
| 54 | C | 11.402023  | -1.538785 | -0.384459 |
| 55 | H | 11.78885   | -0.956077 | -1.213762 |
| 56 | C | 11.981521  | -2.758559 | -0.043922 |
| 57 | H | 12.826951  | -3.125708 | -0.618991 |
| 58 | C | 11.472737  | -3.51436  | 1.013973  |
| 59 | H | 11.921844  | -4.46882  | 1.271435  |
| 60 | C | 10.381112  | -3.031235 | 1.738174  |
| 61 | H | 9.980113   | -3.605728 | 2.568405  |
| 62 | C | 9.807416   | -1.803331 | 1.417604  |
| 63 | H | 8.96749    | -1.421018 | 1.987905  |
| 64 | C | -10.079066 | 1.689795  | 0.369332  |
| 65 | C | -9.434004  | 2.338434  | 1.43217   |
| 66 | H | -8.674578  | 1.808185  | 1.997212  |
| 67 | C | -9.766794  | 3.65159   | 1.75518   |
| 68 | H | -9.258285  | 4.141607  | 2.580821  |
| 69 | C | -10.756952 | 4.329004  | 1.040922  |
| 70 | H | -11.019155 | 5.350161  | 1.30071   |
| 71 | C | -11.407032 | 3.679402  | -0.010111 |
| 72 | H | -12.175331 | 4.196244  | -0.578411 |
| 73 | C | -11.067485 | 2.373031  | -0.353149 |
| 74 | H | -11.5645   | 1.872717  | -1.177521 |
| 75 | C | -10.770087 | -0.566181 | -0.298237 |
| 76 | C | -10.613876 | -1.450172 | -1.375303 |
| 77 | H | -9.698865  | -1.421826 | -1.957483 |
| 78 | C | -11.625144 | -2.354746 | -1.689406 |
| 79 | H | -11.490521 | -3.034209 | -2.52639  |
| 80 | C | -12.810106 | -2.3783   | -0.951276 |
| 81 | H | -13.599586 | -3.07965  | -1.203929 |
| 82 | C | -12.970036 | -1.49041  | 0.114347  |
| 83 | H | -13.884415 | -1.502211 | 0.700972  |
| 84 | C | -11.956514 | -0.595502 | 0.448138  |
| 85 | H | -12.075596 | 0.086204  | 1.28366   |

**Table S7.** Cartesian Coordinates for compound **2**, optimized at the B3LYP-D3/6-31G(d) level of theory

| Center Number | Atomic Type | Coordinates (Angstroms) |           |           |
|---------------|-------------|-------------------------|-----------|-----------|
|               |             | X                       | Y         | Z         |
| 1             | S           | 0.440981                | -0.089514 | 0.044398  |
| 2             | N           | 2.658109                | 2.308131  | -0.565038 |
| 3             | N           | -6.336909               | 0.178418  | -0.008194 |
| 4             | C           | 3.825507                | 0.051473  | -0.042284 |
| 5             | C           | 3.103727                | -1.090676 | 0.167178  |
| 6             | H           | 3.679176                | -2.001282 | 0.314442  |
| 7             | C           | 1.69253                 | -1.313334 | 0.208725  |
| 8             | C           | 1.111222                | -2.561704 | 0.394015  |
| 9             | H           | 1.706775                | -3.460855 | 0.513941  |
| 10            | C           | -0.296067               | -2.545369 | 0.393548  |
| 11            | H           | -0.90644                | -3.435057 | 0.493172  |
| 12            | C           | -0.830139               | -1.280651 | 0.209864  |
| 13            | C           | -2.234046               | -0.894821 | 0.152016  |
| 14            | C           | -3.231042               | -1.732676 | 0.687697  |
| 15            | H           | -2.945894               | -2.65508  | 1.183666  |
| 16            | C           | -4.571387               | -1.384274 | 0.639235  |
| 17            | H           | -5.317503               | -2.038969 | 1.075429  |
| 18            | C           | -4.975936               | -0.176021 | 0.044108  |
| 19            | C           | -3.989332               | 0.668488  | -0.493325 |
| 20            | H           | -4.282972               | 1.598621  | -0.966709 |
| 21            | C           | -2.650001               | 0.315086  | -0.434911 |
| 22            | H           | -1.914403               | 0.976396  | -0.883762 |
| 23            | C           | 3.164015                | 1.286309  | -0.324816 |
| 24            | C           | -7.332273               | -0.822597 | -0.164634 |
| 25            | C           | -7.1608                 | -1.853506 | -1.098951 |
| 26            | H           | -6.260352               | -1.878607 | -1.703788 |
| 27            | C           | -8.139177               | -2.834091 | -1.244084 |
| 28            | H           | -7.994297               | -3.628034 | -1.971375 |
| 29            | C           | -9.305899               | -2.789756 | -0.478349 |
| 30            | H           | -10.070169              | -3.551465 | -0.599819 |
| 31            | C           | -9.481607               | -1.756253 | 0.443815  |
| 32            | H           | -10.38261               | -1.713292 | 1.049272  |
| 33            | C           | -8.500169               | -0.781867 | 0.609131  |
| 34            | H           | -8.629877               | 0.016608  | 1.332114  |
| 35            | C           | -6.732987               | 1.538297  | 0.098038  |
| 36            | C           | -7.738362               | 2.044604  | -0.737051 |
| 37            | H           | -8.200352               | 1.390374  | -1.468853 |
| 38            | C           | -8.138065               | 3.373743  | -0.621686 |
| 39            | H           | -8.918418               | 3.754105  | -1.274828 |
| 40            | C           | -7.531974               | 4.217699  | 0.31081   |
| 41            | H           | -7.840451               | 5.255551  | 0.392545  |
| 42            | C           | -6.525513               | 3.714836  | 1.137707  |

|    |   |           |           |           |
|----|---|-----------|-----------|-----------|
| 43 | H | -6.050984 | 4.358936  | 1.872598  |
| 44 | C | -6.13257  | 2.382055  | 1.042877  |
| 45 | H | -5.359873 | 1.987091  | 1.693936  |
| 46 | C | 5.303158  | 0.089895  | -0.021107 |
| 47 | C | 6.000534  | 1.110808  | -0.688945 |
| 48 | C | 6.057351  | -0.880988 | 0.660568  |
| 49 | C | 7.38937   | 1.141293  | -0.698461 |
| 50 | H | 5.444902  | 1.877854  | -1.219311 |
| 51 | C | 7.445127  | -0.848175 | 0.646613  |
| 52 | H | 5.555757  | -1.648116 | 1.241933  |
| 53 | C | 8.144716  | 0.160873  | -0.036519 |
| 54 | H | 7.898236  | 1.923329  | -1.253529 |
| 55 | H | 7.999196  | -1.592358 | 1.210605  |
| 56 | C | 9.623837  | 0.193446  | -0.045943 |
| 57 | C | 10.369507 | -0.99583  | -0.091986 |
| 58 | C | 10.319254 | 1.413113  | -0.009466 |
| 59 | C | 11.762175 | -0.967115 | -0.100815 |
| 60 | H | 9.850316  | -1.948009 | -0.149275 |
| 61 | C | 11.711903 | 1.44237   | -0.019899 |
| 62 | H | 9.76182   | 2.342801  | 0.055317  |
| 63 | C | 12.440008 | 0.252428  | -0.065174 |
| 64 | H | 12.319079 | -1.898982 | -0.145239 |
| 65 | H | 12.229734 | 2.396779  | 0.017152  |
| 66 | H | 13.525958 | 0.275367  | -0.072616 |

**Table S8.** Cartesian Coordinates for compound **3**, optimized at the B3LYP-D3/6-31G(d) level of theory

| Center Number | Atomic Type | Coordinates (Angstroms) |           |           |
|---------------|-------------|-------------------------|-----------|-----------|
|               |             | X                       | Y         | Z         |
| 1             | S           | 0.442168                | -0.084708 | 0.073066  |
| 2             | N           | 2.663498                | 2.339057  | -0.363996 |
| 3             | N           | -6.334014               | 0.172797  | -0.034422 |
| 4             | C           | 3.828544                | 0.054042  | 0.021329  |
| 5             | C           | 3.103586                | -1.077897 | 0.274346  |
| 6             | H           | 3.675478                | -1.978486 | 0.483144  |
| 7             | C           | 1.692957                | -1.293247 | 0.332771  |
| 8             | C           | 1.110284                | -2.525119 | 0.607209  |
| 9             | H           | 1.705212                | -3.413265 | 0.793833  |
| 10            | C           | -0.296242               | -2.509528 | 0.597495  |
| 11            | H           | -0.90778                | -3.389166 | 0.759289  |
| 12            | C           | -0.829113               | -1.261714 | 0.316284  |
| 13            | C           | -2.232486               | -0.882378 | 0.223849  |
| 14            | C           | -3.230419               | -1.673905 | 0.824658  |
| 15            | H           | -2.945919               | -2.551639 | 1.396288  |
| 16            | C           | -4.570642               | -1.33163  | 0.744524  |
| 17            | H           | -5.317421               | -1.94858  | 1.231566  |
| 18            | C           | -4.974239               | -0.17647  | 0.050735  |



|    |   |            |           |           |
|----|---|------------|-----------|-----------|
| 19 | C | -3.986295  | 0.621502  | -0.552256 |
| 20 | H | -4.279458  | 1.508658  | -1.10203  |
| 21 | C | -2.647207  | 0.27499   | -0.461726 |
| 22 | H | -1.91062   | 0.897202  | -0.961929 |
| 23 | C | 3.168896   | 1.30331   | -0.192096 |
| 24 | C | -7.332468  | -0.834849 | -0.106506 |
| 25 | C | -7.156755  | -1.950619 | -0.936778 |
| 26 | H | -6.24985   | -2.037708 | -1.525929 |
| 27 | C | -8.139658  | -2.935337 | -1.000526 |
| 28 | H | -7.991282  | -3.795137 | -1.647809 |
| 29 | C | -9.315191  | -2.812343 | -0.257183 |
| 30 | H | -10.083009 | -3.577882 | -0.315439 |
| 31 | C | -9.495037  | -1.694859 | 0.56029   |
| 32 | H | -10.402936 | -1.58961  | 1.147523  |
| 33 | C | -8.509275  | -0.714593 | 0.645143  |
| 34 | H | -8.642633  | 0.149218  | 1.287819  |
| 35 | C | -6.726812  | 1.538379  | -0.052916 |
| 36 | C | -7.714549  | 1.973591  | -0.946651 |
| 37 | H | -8.165999  | 1.260164  | -1.628018 |
| 38 | C | -8.110816  | 3.308797  | -0.952888 |
| 39 | H | -8.877618  | 3.63382   | -1.650417 |
| 40 | C | -7.518233  | 4.227847  | -0.08493  |
| 41 | H | -7.823977  | 5.26962   | -0.097909 |
| 42 | C | -6.529043  | 3.795171  | 0.800427  |
| 43 | H | -6.065338  | 4.498516  | 1.486251  |
| 44 | C | -6.14012   | 2.458028  | 0.827147  |
| 45 | H | -5.381288  | 2.118449  | 1.524345  |
| 46 | C | 5.305961   | 0.076984  | -0.026015 |
| 47 | C | 6.057511   | -1.089248 | -0.254354 |
| 48 | C | 6.005926   | 1.282533  | 0.154307  |
| 49 | C | 7.444878   | -1.05382  | -0.273083 |
| 50 | H | 5.555519   | -2.033019 | -0.440911 |
| 51 | C | 7.39442    | 1.314468  | 0.134832  |
| 52 | H | 5.452348   | 2.20309   | 0.309362  |
| 53 | C | 8.144539   | 0.147545  | -0.074812 |
| 54 | H | 7.997183   | -1.974938 | -0.432036 |
| 55 | H | 7.904888   | 2.264536  | 0.258787  |
| 56 | C | 9.621762   | 0.182318  | -0.098114 |
| 57 | C | 10.34989   | 1.054634  | 0.724173  |
| 58 | C | 10.365907  | -0.654757 | -0.942455 |
| 59 | C | 11.741273  | 1.048368  | 0.664695  |
| 60 | H | 9.840143   | 1.7123    | 1.42114   |
| 61 | C | 11.756552  | -0.582859 | -0.923748 |
| 62 | H | 9.868017   | -1.334982 | -1.626241 |
| 63 | N | 12.453905  | 0.249093  | -0.139596 |
| 64 | H | 12.315455  | 1.717866  | 1.302852  |
| 65 | H | 12.342765  | -1.224358 | -1.579549 |

**Table S9.** Cartesian Coordinates for compound **4**, optimized at the B3LYP-D3/6-31G(d) level of theory

| Center Number | Atomic Type | Coordinates (Angstroms) |           |           |
|---------------|-------------|-------------------------|-----------|-----------|
|               |             | X                       | Y         | Z         |
| 1             | S           | 0.14181                 | -0.084226 | 0.044162  |
| 2             | N           | 2.359879                | 2.336608  | -0.48496  |
| 3             | N           | -6.631146               | 0.148403  | -0.030282 |
| 4             | C           | 3.524243                | 0.068276  | -0.017354 |
| 5             | C           | 2.80565                 | -1.058384 | 0.277557  |
| 6             | H           | 3.381333                | -1.948366 | 0.519432  |
| 7             | C           | 1.398334                | -1.276861 | 0.346749  |
| 8             | C           | 0.82204                 | -2.500482 | 0.67209   |
| 9             | H           | 1.42167                 | -3.378009 | 0.891097  |
| 10            | C           | -0.58308                | -2.4909   | 0.667512  |
| 11            | H           | -1.190911               | -3.365391 | 0.866117  |
| 12            | C           | -1.122324               | -1.256076 | 0.338562  |
| 13            | C           | -2.526803               | -0.886843 | 0.238294  |
| 14            | C           | -3.517695               | -1.654605 | 0.880706  |
| 15            | H           | -3.226232               | -2.505758 | 1.487939  |
| 16            | C           | -4.859147               | -1.319491 | 0.797218  |
| 17            | H           | -5.599554               | -1.91626  | 1.317736  |
| 18            | C           | -5.272086               | -0.195899 | 0.057343  |
| 19            | C           | -4.290524               | 0.576949  | -0.589061 |
| 20            | H           | -4.590258               | 1.438003  | -1.175327 |
| 21            | C           | -2.950311               | 0.23824   | -0.494392 |
| 22            | H           | -2.21976                | 0.839475  | -1.02805  |
| 23            | C           | 2.864466                | 1.307342  | -0.275634 |
| 24            | C           | -7.634407               | -0.857764 | -0.026338 |
| 25            | C           | -7.47497                | -2.023556 | -0.788202 |
| 26            | H           | -6.576424               | -2.152047 | -1.382544 |
| 27            | C           | -8.46401                | -3.004152 | -0.778712 |
| 28            | H           | -8.328663               | -3.903141 | -1.373422 |
| 29            | C           | -9.62947                | -2.82782  | -0.030288 |
| 30            | H           | -10.402141              | -3.590643 | -0.031902 |
| 31            | C           | -9.79328                | -1.660597 | 0.718143  |
| 32            | H           | -10.693415              | -1.513264 | 1.30818   |
| 33            | C           | -8.801154               | -0.683196 | 0.730033  |
| 34            | H           | -8.922172               | 0.219942  | 1.318794  |
| 35            | C           | -7.023483               | 1.51197   | -0.12601  |
| 36            | C           | -8.010302               | 1.895838  | -1.043406 |
| 37            | H           | -8.461408               | 1.145006  | -1.68356  |
| 38            | C           | -8.406003               | 3.228807  | -1.124952 |
| 39            | H           | -9.172181               | 3.514715  | -1.839993 |
| 40            | C           | -7.813617               | 4.194592  | -0.309097 |
| 41            | H           | -8.119051               | 5.234056  | -0.380656 |
| 42            | C           | -6.825626               | 3.812312  | 0.600389  |
| 43            | H           | -6.362727               | 4.552916  | 1.246297  |

|    |   |           |           |           |
|----|---|-----------|-----------|-----------|
| 44 | C | -6.437375 | 2.478547  | 0.702251  |
| 45 | H | -5.679716 | 2.177954  | 1.418441  |
| 46 | C | 5.002588  | 0.091892  | -0.058611 |
| 47 | C | 5.696447  | 1.305503  | 0.073004  |
| 48 | C | 5.751072  | -1.081446 | -0.240738 |
| 49 | C | 7.088364  | 1.334967  | 0.049648  |
| 50 | H | 5.144993  | 2.231735  | 0.188959  |
| 51 | C | 7.142268  | -1.043072 | -0.25757  |
| 52 | H | 5.254834  | -2.029892 | -0.407067 |
| 53 | C | 7.8257    | 0.163185  | -0.110404 |
| 54 | H | 8.907711  | 0.192569  | -0.144508 |
| 55 | C | 7.914512  | -2.327323 | -0.398051 |
| 56 | C | 7.807626  | 2.641083  | 0.261489  |
| 57 | F | 7.237806  | -3.24182  | -1.127954 |
| 58 | F | 8.158201  | -2.889235 | 0.808136  |
| 59 | F | 9.109694  | -2.132375 | -0.992683 |
| 60 | F | 7.086929  | 3.68972   | -0.185329 |
| 61 | F | 9.000135  | 2.661254  | -0.372357 |
| 62 | F | 8.053692  | 2.857203  | 1.573647  |
